# Supplementary material for: Pathogen inhibition and indication by gelatin nonwoven mats with incorporation of polyphenol derivatives
Source: Royal Society of Chemistry journal article supplement (doi:10.1039/d3ra05905g), 2023-01-01
Supplement: d3ra05905g1.pdf [file d3ra05905g1.pdf]

# Pathogen inhibition and indication by gelatin nonwoven mats with incorporation of polyphenol derivatives

By *Meng-Yi Bai*<sup>a, .b, \*</sup>, *Ting-Teng Wang*<sup>a</sup>, *Xin-An Chen*<sup>a</sup>, *Chia-Chun Wu*<sup>c</sup>

[a] Graduate Institute of Biomedical Engineering and Biomedical Engineering Program, Graduate Institute of Applied Science and Technology, National Taiwan University of Science and Technology, TR-917, AAEON Building, No. 43, Keelung Rd., Sec. 4, Da'an Dist., Taipei City 10607, Taiwan, ROC

[b] Adjunct Appointment to the National Defense Medical Center, Taipei 11490, Taiwan, ROC

[c] Institute of Prevention Medicine, National Defense Medical Center, Taipei 11490, Taiwan, ROC

[\*] Correspondence to: Prof. M.-Y. Bai, Ph.D.

Graduate Institute of Biomedical Engineering, National Taiwan University of Science and Technology, TR-917, AAEON Building, No. 43, Keelung Rd., Sec. 4, Da'an Dist., Taipei City 10607, Taiwan, ROC

E-mail: [mybai@mail.ntust.edu.tw](mailto:mybai@mail.ntust.edu.tw)

This work was supported by grants from the Ministry of Science and Technology, Taiwan (MOST 109-2221-E-011-036, 108-2221-E-011-113, and 111-2221-E-011-151).

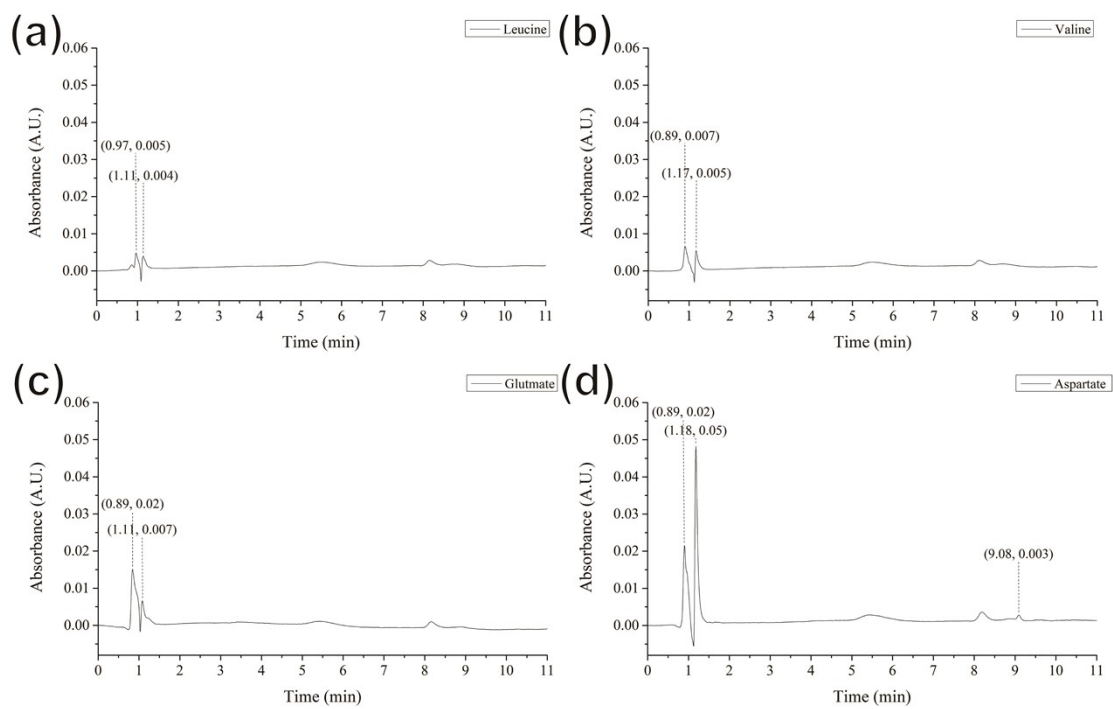

**Figure S1** HPLC analysis and the chromatograms of standard compounds of (a) leucine, (b) valine, (c) glutamate, and (d) aspartate for comparison.

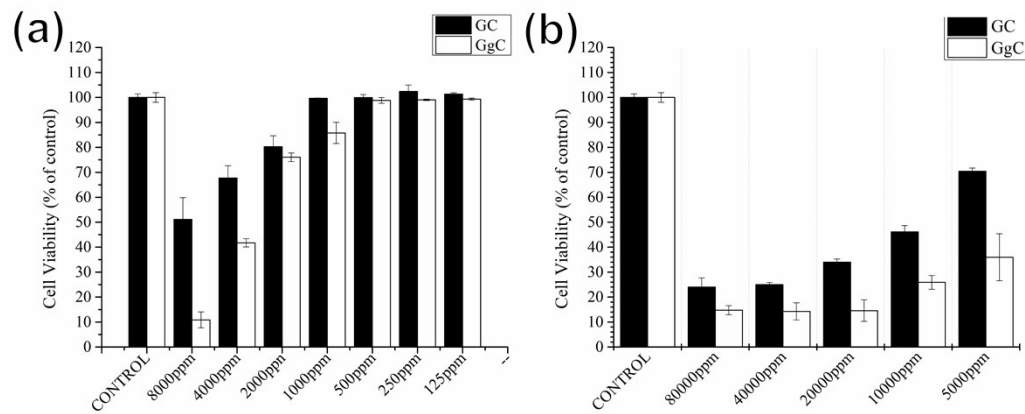

**Figure S2** MTT assay for determining the safe concentration that was identified through a series of different concentrations (a) 125 ppm-8000 ppm, and (b) 5000-80000 rpm, against MDCK cells.
